# Supplementary material
Source: Royal Society of Chemistry journal article supplement (doi:10.1039/d5gc06199g)
Supplement: d5gc06199g1.pdf [file d5gc06199g1.pdf]

**Table:** Techno-economic assessment of sustainable isoprene production coupled with carbon dioxide sequestration using genetically engineered *Synechococcus elongatus* UTEX 2973

Indrajeet Yadav<sup>1</sup>, Akhil Rautela<sup>1</sup>, Agendra Gangwar<sup>1</sup>, Preeti Yadav<sup>1</sup>, Sanjay Kumar<sup>1\*</sup>

<sup>1</sup>Biofuel Research Lab, School of Biochemical Engineering, IIT(BHU) Varanasi, Uttar Pradesh, 221005 India.

---

\* Dr. Sanjay Kumar  
Associate Professor,  
School of Biochemical Engineering,  
Indian Institute of Technology (BHU) Varanasi,  
Varanasi, U.P., India- 221005,  
Email: sanjaykr.bce@iitbhu.ac.in



## Supplementary information

The following formulas were used for the techno-economic analysis of Isoprene production

*Depreciation Cost (DC) per year:*

$$DC = \frac{\text{Acquisition Cost (CAPEX)} - \text{Residual (40\% of CAPEX)}}{20}$$

*Return on Investment (ROI):*

$$ROI = \frac{DR \times [1 + DR]^{ELS}}{[1 + DR]^{ELS} - 1}$$

*Income tax (IT):*

$$IT = TR \times (IR + ER - OC - DC)$$

*At the breakeven point, total cost should be equal to total revenue:*

$$IR + ER = OC + ROI + IT$$

*Minimum isoprene selling price (MISP):*

$$MISP = \frac{IR}{\text{Isoprene production}}$$

Where CapEx: Capital expenditure; DC: Depreciation cost; DR: Discount rate; ELS: Economic life of project; ER: Revenue without isoprene; IR: Isoprene revenue; OC: Operating cost; TPI: Total project investment; TR: Tax rate; Re: residual.

**Table S1:** Key parameters used in the calculations and their respective value:

| <b>Parameters required</b> |                                      | <b>Million USD</b> |
|----------------------------|--------------------------------------|--------------------|
| IR                         | Isoprene Revenue                     | 4.848              |
| ER                         | Revenue without isoprene             | 0.055              |
| OC                         | Operating Cost                       | 2.234              |
| DR                         | Discount rate                        | 0.067              |
| TPI                        | Total Project investment             | 21.160             |
| DC                         | Depreciation cost (million USD/year) | 0.635              |
| Interest                   | Interest rate                        | 0.200              |
| TR                         | Tax Rate                             | 0.350              |
| Re                         | Residual (salvage value)             | 8.464              |
| ELS                        | Economic life of project (Year)      | 20.000             |
| Capex                      | Capital cost                         | 21.160             |

**Table S2:** Isoprene revenue calculation.

| <b>Parameter</b>                         | <b>Value</b>            |
|------------------------------------------|-------------------------|
| Depreciation cost (million USD/year)     | 0.634798818             |
| ROI                                      | 1.95716889              |
| Income tax (IT)                          | $0.35 * IR - 0.9846448$ |
| Isoprene revenue (IR) (million USD/year) | 4.847686353             |
| Isoprene revenue (IR) (USD/year)         | 4847686.353             |

**Table S3:** Minimum isoprene selling price at different isoprene productivity.

|                           | Isoprene productivity (g/m <sup>3</sup> /day) | Isoprene production (kg/year) | IR (USD/year) | MISP (USD/kg) |                    |
|---------------------------|-----------------------------------------------|-------------------------------|---------------|---------------|--------------------|
| Experimental productivity | 0.744                                         | 9992.664                      | 4847686.353   | 485.125       |                    |
| 10x                       | 7.440                                         | 99926.640                     | 4847686.353   | 48.512        |                    |
| 20x                       | 14.880                                        | 199853.280                    | 4847686.353   | 24.256        | <b>Lower bound</b> |
| 30x                       | 22.320                                        | 299779.920                    | 4847686.353   | 16.171        | <b>Base case</b>   |
| 40x                       | 29.760                                        | 399706.560                    | 4847686.353   | 12.128        | <b>Upper bound</b> |
| 50x                       | 37.200                                        | 499633.200                    | 4847686.353   | 9.702         |                    |
| 60x                       | 44.640                                        | 599559.840                    | 4847686.353   | 8.085         |                    |
| 70x                       | 52.080                                        | 699486.480                    | 4847686.353   | 6.930         |                    |
| 80x                       | 59.520                                        | 799413.120                    | 4847686.353   | 6.064         |                    |
| 90x                       | 66.960                                        | 899339.760                    | 4847686.353   | 5.390         |                    |
| 100x                      | 74.400                                        | 999266.400                    | 4847686.353   | 4.851         |                    |

**Table S4:** List of parameters and their respective base case, lower, and upper bound values.

| <b>Parameter</b>                              | <b>Lower bound</b> | <b>Base value</b> | <b>Upper bound</b> |
|-----------------------------------------------|--------------------|-------------------|--------------------|
| Isoprene productivity (g/m <sup>3</sup> /day) | 14.88              | 22.32             | 29.76              |
| Project length (year)                         | 15.00              | 20.00             | 30.00              |
| Nitrogen cost (\$/kg)                         | 0.23               | 0.43              | 0.63               |
| Total capital investment (%)                  | 80.00              | 100.00            | 120.00             |
| Fixed cost of production (%)                  | 80.00              | 100.00            | 120.00             |
| Cost of land \$/acre                          | 3000.00            | 4000.00           | 12000.00           |
| IPTG cost (\$/kg)                             | 3.00               | 7.00              | 11.00              |
| PBR density (%)                               | 50.00              | 100.00            | 200.00             |

**Table S5:** Change in Isoprene MISP at lower and upper bounds and base case values of different key factors.

| <b>Key factor</b>                             | <b>MISP lower bound</b> | <b>MISP upper bound</b> | <b>MISP base value</b> | <b>MISP (high diff)</b> | <b>MISP (low diff)</b> |
|-----------------------------------------------|-------------------------|-------------------------|------------------------|-------------------------|------------------------|
| Isoprene productivity (g/m <sup>3</sup> /day) | 24.250                  | 12.128                  | 16.171                 | 8.079                   | -4.043                 |
| Project length (year)                         | 17.470                  | 15.030                  | 16.171                 | 1.299                   | -1.141                 |
| Nitrogen cost (\$/kg)                         | 15.970                  | 16.370                  | 16.171                 | 0.199                   | -0.201                 |
| Total capital investment (%)                  | 14.410                  | 17.950                  | 16.171                 | 1.779                   | -1.761                 |
| Fixed operating cost (%)                      | 15.100                  | 17.250                  | 16.171                 | 1.079                   | -1.071                 |
| Cost of land                                  | 15.860                  | 18.580                  | 16.171                 | 2.409                   | -0.311                 |
| IPTG cost (\$/kg)                             | 15.520                  | 16.820                  | 16.171                 | 0.649                   | -0.651                 |
| PBR density (%)                               | 17.350                  | 15.550                  | 16.171                 | 1.179                   | -0.621                 |
